# Supplementary material for: Characterization of Genetic Variability of Venezuelan Equine Encephalitis Viruses
Source: PLoS One. 2016 Apr 7;11(4):e0152604. doi: 10.1371/journal.pone.0152604 (PMC4824352; doi:10.1371/journal.pone.0152604)
Supplement: S4 Table — (XLSX) [file pone.0152604.s007.xlsx]

## Sheet: Table S5
Virus strain	Experimental treatment	Replicate mouse number	Closest genome	Allele differences from closest genome	Concordant calls	Total calls	Allele differences from correct genome	Percent concordant
VEEV IAB-VE-vaccine-TC83	Extract from brain of infected mouse	1	IAB-VE-vaccine-TC-83-u	45	1969	2014	45	97.8
		2	IAB-VE-vaccine-TC-83-u	38	1976	2014	38	98.1
		3	IAB-VE-vaccine-TC-83-u	49	1965	2014	49	97.6
(*) Probe signals on this array were close to background level for all probes.
